# Supplementary material for: A near-infrared fluorescent probe for ratiometric sensing of SO2 in cells and zebrafish
Source: Royal Society of Chemistry journal article supplement (doi:10.1039/d0an01468k), 2020-01-01
Supplement: d0an01468k1.pdf [file d0an01468k1.pdf]

## Electronic Supplementary Information

# A near-infrared fluorescent probe for ratiometric sensing of SO<sub>2</sub> in cells and zebrafish

Mengya Lv,<sup>a</sup> Yanhao Zhang,<sup>c</sup> Jiayi Fan,<sup>a</sup> Yanyun Yang,<sup>a</sup> Sheng Chen,<sup>\*,a,b</sup> Gaolin Liang,<sup>\*,b</sup> and Shusheng, Zhang<sup>\*,b</sup>

<sup>a</sup>College of Chemistry, Zhengzhou University, 100 Kexue Road, Zhengzhou, Henan 450001, China

<sup>b</sup>Center for Advanced Analysis & Gene Sequencing, Zhengzhou University, 100 Kexue Road, Zhengzhou, Henan 450001, China

<sup>c</sup>State Key Laboratory of Environmental and Biological Analysis, Department of Chemistry, Hong Kong Baptist University, Hong Kong SAR, China

## Table of Contents:

|                                                                                           |    |
|-------------------------------------------------------------------------------------------|----|
| Synthesis, $^1\text{H}$ NMR and $^{13}\text{C}$ NMR, HR-MS.....                           | 3  |
| AIEE mechanism and sensing mechanism.....                                                 | 5  |
| Sensing properties of probe <b>Mito-HN</b> toward $\text{HSO}_3^-/\text{SO}_3^{2-}$ ..... | 8  |
| Selectivity and interference.....                                                         | 11 |
| CCK-8 assay.....                                                                          | 12 |
| Cell imaging.....                                                                         | 13 |
| References.....                                                                           | 14 |

## 1. Synthesis, <sup>1</sup>H- and <sup>13</sup>C-NMR, HR-MS

**Synthesis of compound 1.** The solution of 2-hydroxy-1-naphthaldehyde (516 mg, 3 mmol), acrolein (0.5 mL, 7.5 mmol) and K<sub>2</sub>CO<sub>3</sub> (1.035g, 7.5mmol) in 1,4-dioxane (60 mL) was heated at 105 °C for 72 h. After the reaction was completed, it was removed from the heating bath, poured into 150 mL of ice water. The resulting mixture was extracted three times with ethyl ether (40 mL). The combined organic layer was washed with saturated NaCl twice, then dried over anhydrous Na<sub>2</sub>SO<sub>4</sub>, and concentrated under vacuum. Then, the crude product was purified by column chromatography on silica gel (ethyl acetate: petroleum ether = 1:5, v/v) to afford light yellow solids (203 mg, 32.2% yield). <sup>1</sup>H NMR (400 MHz, CDCl<sub>3</sub>) δ (ppm): 9.64 (s, 1 H), 7.96 (d, *J* = 8.4 Hz, 1 H), 7.87 (s, 1 H), 7.79 (d, *J* = 8.9 Hz, 1 H), 7.76 (d, *J* = 8.2 Hz, 1 H), 7.61-7.51 (m, 1 H), 7.46-7.37 (m, 1 H), 7.07 (d, *J* = 8.9 Hz, 1 H), 5.09 (s, 1 H); <sup>13</sup>C NMR (101 MHz, CDCl<sub>3</sub>) δ (ppm): 189.52 (s), 155.82 (s), 137.57 (s), 134.11 (s), 130.64 (s), 129.33 (s), 129.29 (s), 128.92 (s), 128.03 (s), 124.58 (s), 120.97 (s), 117.68 (s), 113.89 (s), 63.13 (s). HR-MS (ESI, *m/z*) Calcd for [M+H]<sup>+</sup>, 211.0714; Found, 211.0771.

**Synthesis of compound 2.** The solution of 2,3,3-trimethylindolenine (160 mg, 1 mmol) and 1,3-propane sultone (150 mg, 1.2 mmol) in toluene (5 mL) was heated under reflux for 24 h. The resulting solution was cooled to room temperature and filtered. The filtered product was washed with diethyl ether and dried in vacuo to give compound 2 (250 mg, 89% yield) as a pink solid. <sup>1</sup>H NMR (400 MHz, DMSO-*d*<sub>6</sub>) δ (ppm): 8.09-8.04 (m, 1 H), 7.85 (dd, *J* = 5.8, 2.8 Hz, 1 H), 7.67-7.56 (m, 2 H), 4.72-4.63 (m, 2 H), 2.86 (s, 3 H), 2.66 (t, *J* = 6.7 Hz, 2 H), 2.18 (p, *J* = 7.1 Hz, 2 H), 1.55 (6 H); <sup>13</sup>C NMR (101 MHz, DMSO-*d*<sub>6</sub>) δ (ppm): 197.11 (s), 142.43 (s), 141.67 (s), 129.80 (s), 129.41 (s), 123.95 (s), 115.94 (s), 54.63 (s), 54.36 (s), 47.89 (s), 47.06 (s), 24.21 (s), 22.53 (s), 14.33 (s). HR-MS (ESI, *m/z*) Calcd for [M+H]<sup>+</sup>, 282.1119; Found, 282.0936.

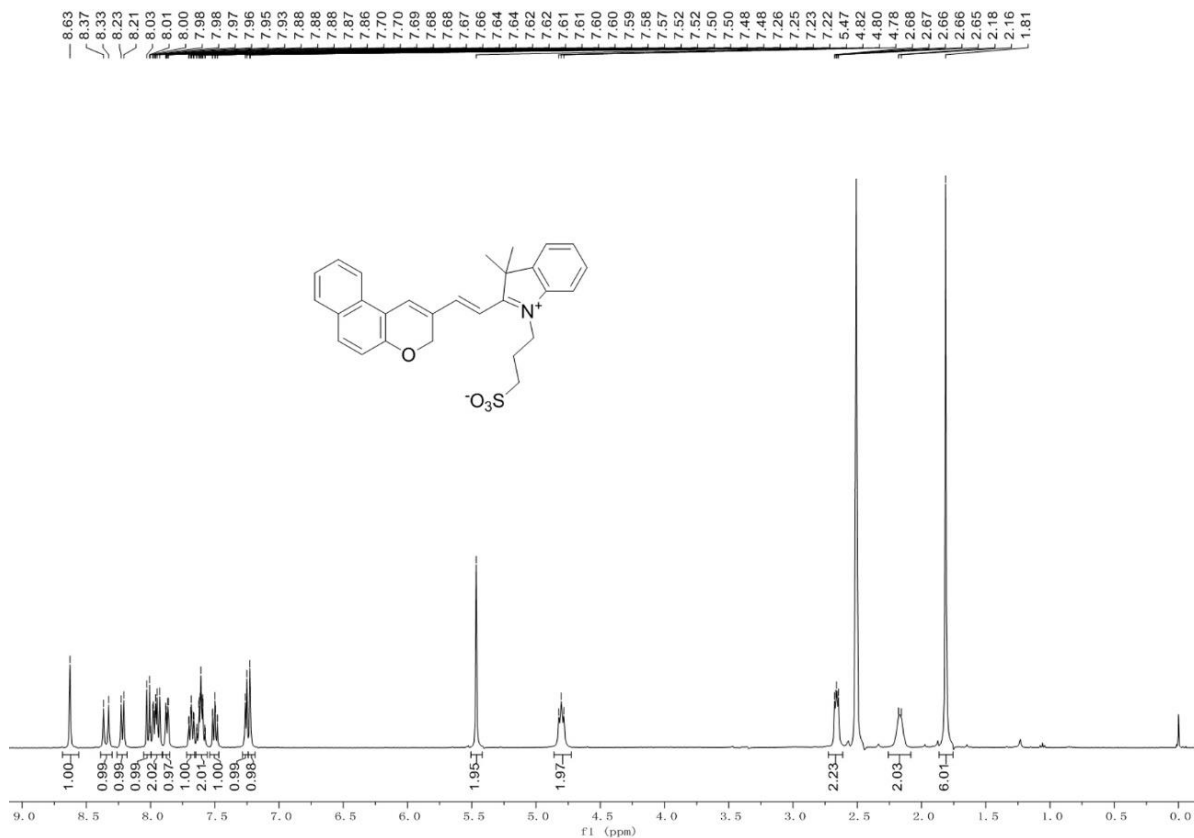

**Figure S1.** <sup>1</sup>H NMR spectrum (DMSO-*d*<sub>6</sub>) of probe Mito-HN

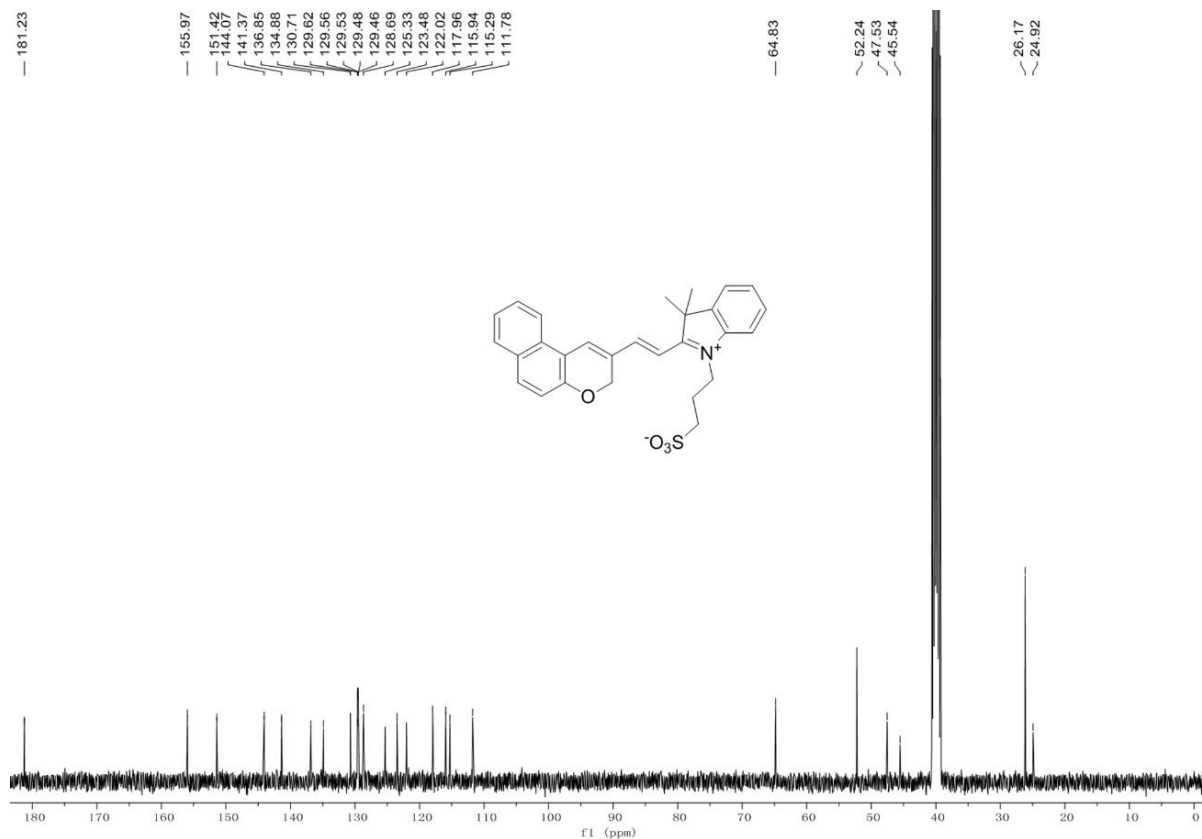

**Figure S2.** <sup>13</sup>C NMR spectrum (DMSO-*d*<sub>6</sub>) of probe **Mito-HN**

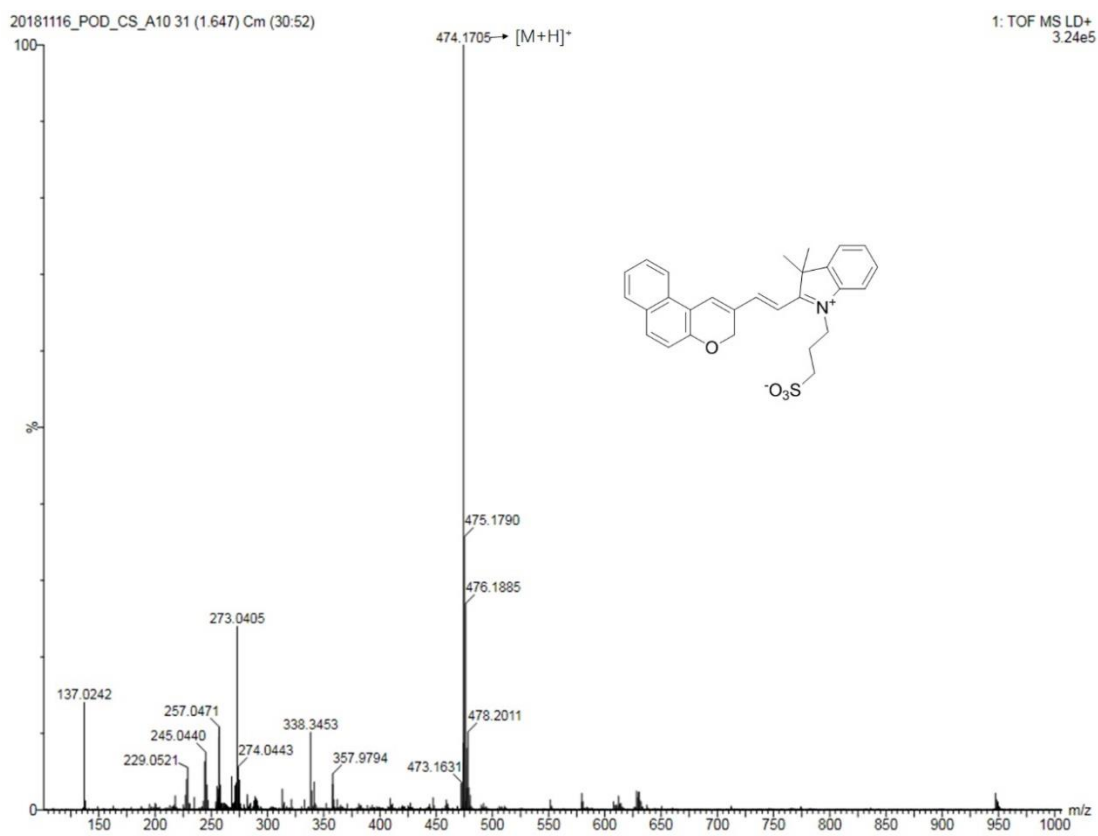

**Figure S3.** MALDI-MS spectrum of probe **Mito-HN**

## 2. AIEE mechanism and sensing mechanism.

**Table S1.** Optical properties of **Mito-HN** before and after reaction with SO<sub>2</sub>, **Mito-HN** crystalline powder, **Mito-HN** in water, PBS, and MeOH/glycerol mixtures with different glycerol fractions.

| Series                                              | $\lambda_{\max}$ (nm) | $\epsilon$ (M <sup>-1</sup> cm <sup>-1</sup> )     | $\lambda_{\text{em}}$ (nm) | $\Phi_{\text{F}}^{\text{a}}$ | Stokes shift (nm) |
|-----------------------------------------------------|-----------------------|----------------------------------------------------|----------------------------|------------------------------|-------------------|
| <b>Mito-HN</b> in PBS (10% DMSO)                    | 530                   | $2.7 \times 10^4$ M <sup>-1</sup> cm <sup>-1</sup> | 668                        | 3.31%                        | 138               |
| <b>Mito-HN-NaHSO<sub>3</sub></b> in PBS (10% DMSO)  | 345                   | $1.9 \times 10^4$ M <sup>-1</sup> cm <sup>-1</sup> | 520                        | 2.24%                        | 175               |
| <b>Mito-HN</b> in water                             | 530                   |                                                    | 668                        | 2.53%                        |                   |
| <b>Mito-HN</b> in PBS                               | 530                   |                                                    | 668                        | 2.52%                        |                   |
| <b>Mito-HN</b> in CH <sub>3</sub> OH                | 530                   | \                                                  | 668                        | 0.72%                        | \                 |
| <b>Mito-HN</b> in CH <sub>3</sub> OH/glycerol (5:5) | 530                   | \                                                  | 668                        | 1.78%                        | \                 |
| <b>Mito-HN</b> in CH <sub>3</sub> OH/glycerol (2:8) | 530                   | \                                                  | 668                        | 4.37%                        | \                 |
| <b>Mito-HN</b> in Crystalline powder                | \                     | \                                                  | 688                        | 12.05%                       | \                 |

<sup>a</sup> Fluorescence quantum yield ( $\Phi_{\text{F}}$ ) in solution was determined using rhodamine B (0.89) in ethanol as a standard.  $\Phi_{\text{F}}$  in the solid state was obtained using an integrating sphere with excitation at 365 nm on an Edinburgh FLS 1000 fluorescence spectrometer.

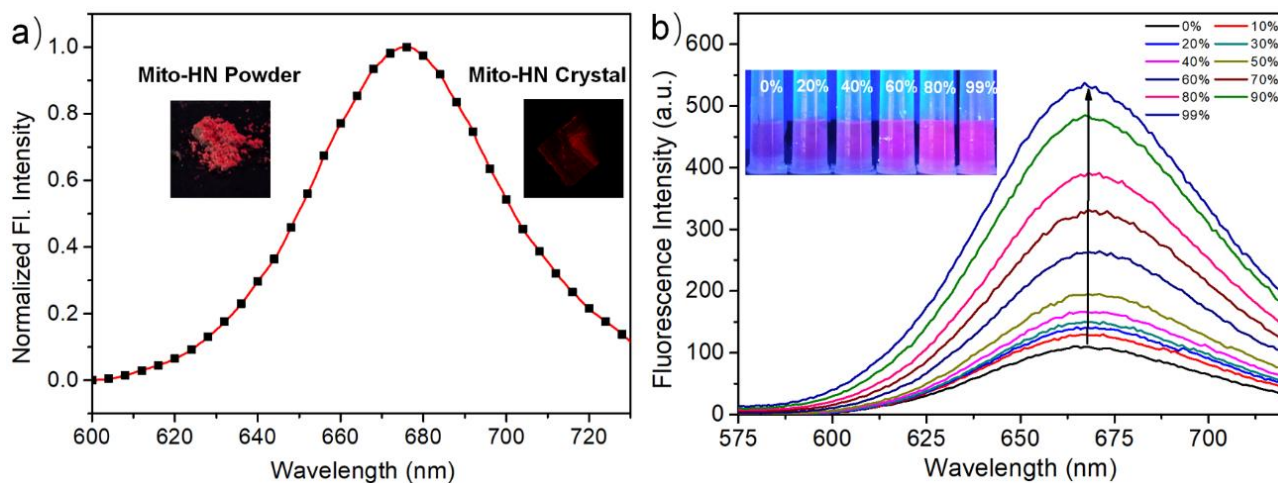

**Figure S4.** (a) Normalized fluorescence spectra of the solid powders of **Mito-HN**. Inset: photos of as-prepared solid powders and the red crystal of **Mito-HN** under UV light. (b) Fluorescence spectra of **Mito-HN** (10  $\mu\text{M}$ ) in MeOH/glycerol mixtures with different glycerol fractions. Inset: photos of **Mito-HN** (10  $\mu\text{M}$ ) in MeOH/glycerol mixtures with different glycerol fractions under UV light.

**Table S2.** Selected crystallographic data for probe **Mito-HN**.

| crystals                                          | <b>Mito-HN</b>                                    |
|---------------------------------------------------|---------------------------------------------------|
| formula                                           | C <sub>28</sub> H <sub>27</sub> NO <sub>4</sub> S |
| fw [g·mol <sup>-1</sup> ]                         | 473.58                                            |
| crystal color                                     | Red                                               |
| crystal system                                    | Monoclinic                                        |
| space group                                       | <i>P</i> <sub>21</sub> / <i>c</i>                 |
| <i>a</i> [Å]                                      | 7.68126(19)                                       |
| <i>b</i> [Å]                                      | 22.6995(5)                                        |
| <i>c</i> [Å]                                      | 17.9400(3)                                        |
| $\alpha$ [°]                                      | 90                                                |
| $\beta$ [°]                                       | 95.2798(19)                                       |
| $\gamma$ [°]                                      | 90                                                |
| <i>V</i> [Å <sup>3</sup> ]                        | 3114.76 (12)                                      |
| <i>Z</i>                                          | 4                                                 |
| $\rho_{\text{calcd}}$ [g/cm <sup>3</sup> ]        | 1.372                                             |
| $\mu$ [mm <sup>-1</sup> ]                         | 4.371                                             |
| <i>T</i> [K]                                      | 293                                               |
| $\theta_{\text{max}}$ [°]                         | 67.077                                            |
| <i>R/wR</i> [ <i>I</i> > 2 $\sigma$ ( <i>I</i> )] | 0.0683/0.2148                                     |

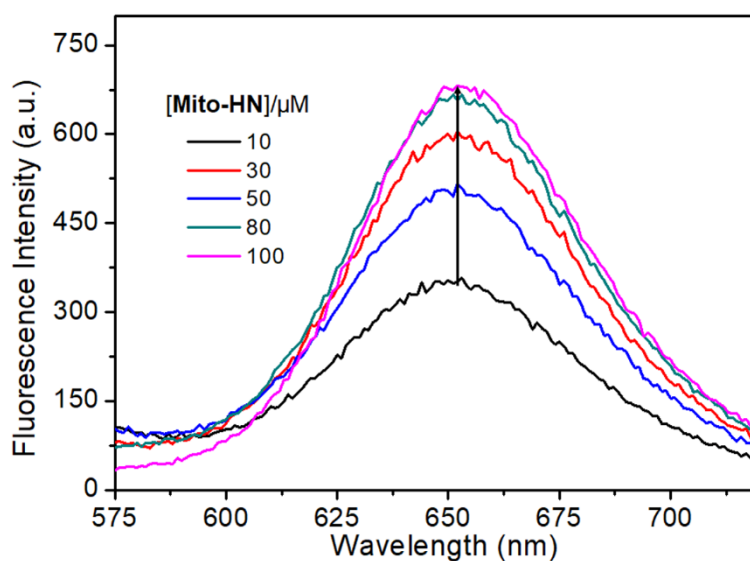**Figure S5.** Fluorescence spectra of different concentration of **Mito-HN** (10, 30, 50, 80, 100 μM) in PBS (10 mM, pH 7.4, containing 10% DMSO).

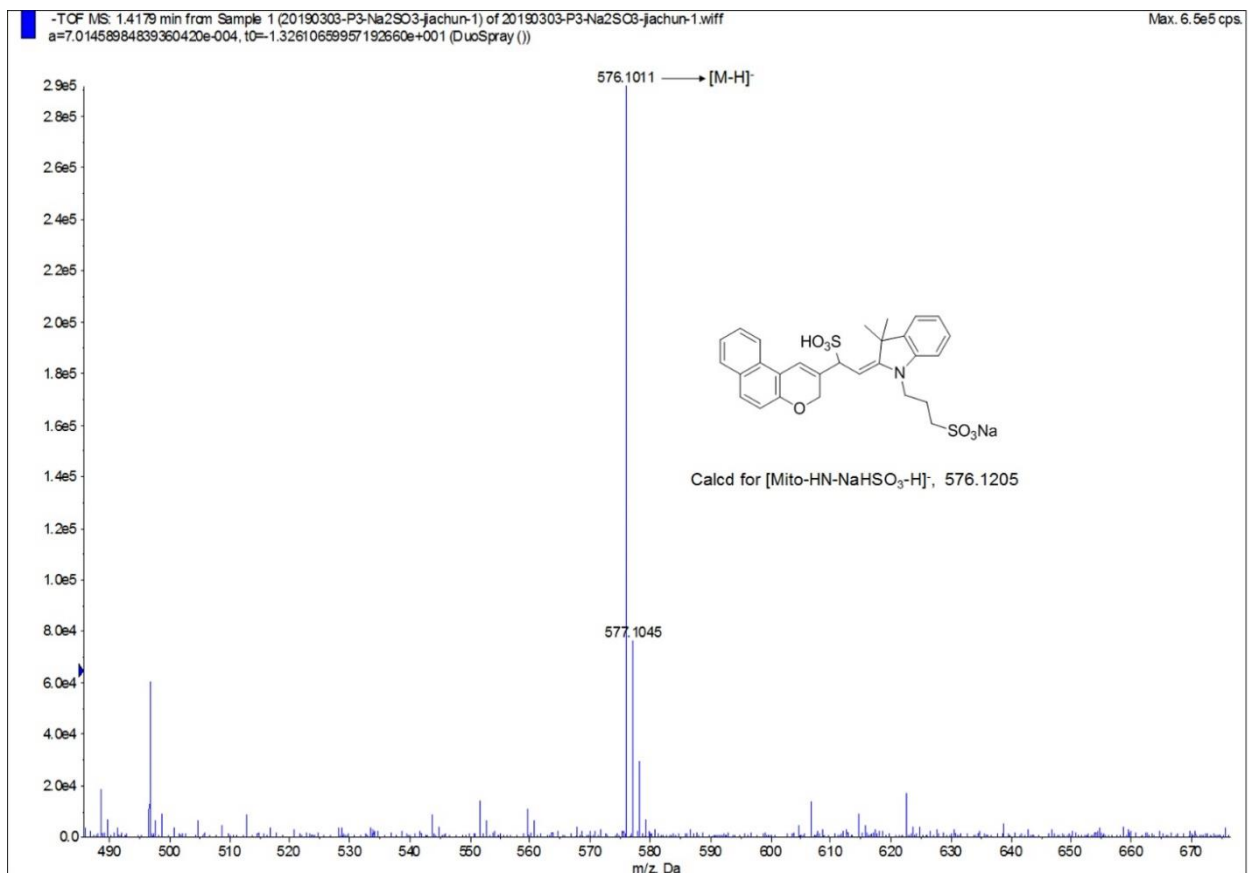

**Figure S6.** ESI-MS of **Mito-HN** treated with Na<sub>2</sub>SO<sub>3</sub> or NaHSO<sub>3</sub>.

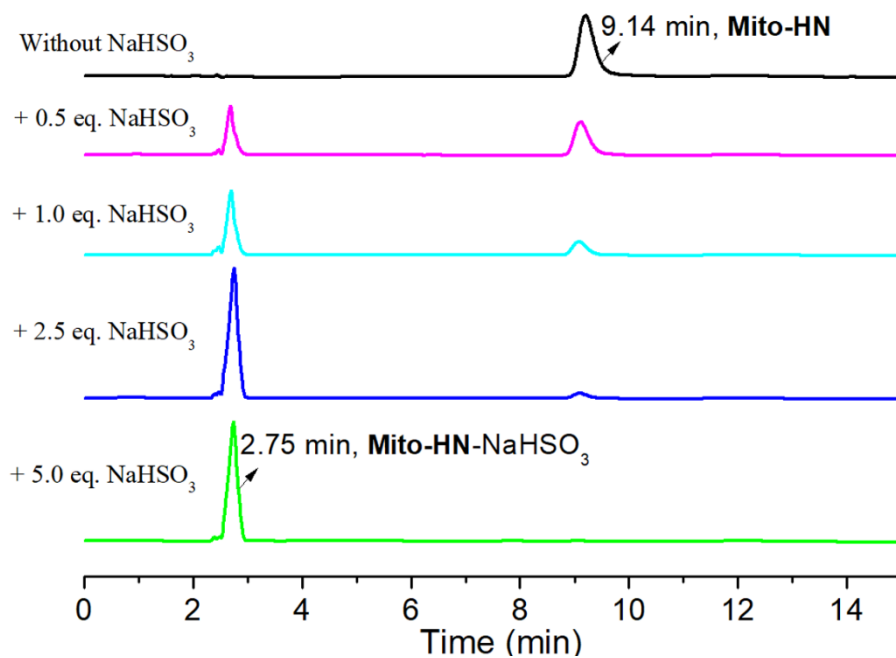

**Figure S7.** The HPLC chromatograms of **Mito-HN** in the presence of different equivalents of NaHSO<sub>3</sub>.

### 3. Sensing properties of probe Mito-HN toward $\text{HSO}_3^-/\text{SO}_3^{2-}$ .

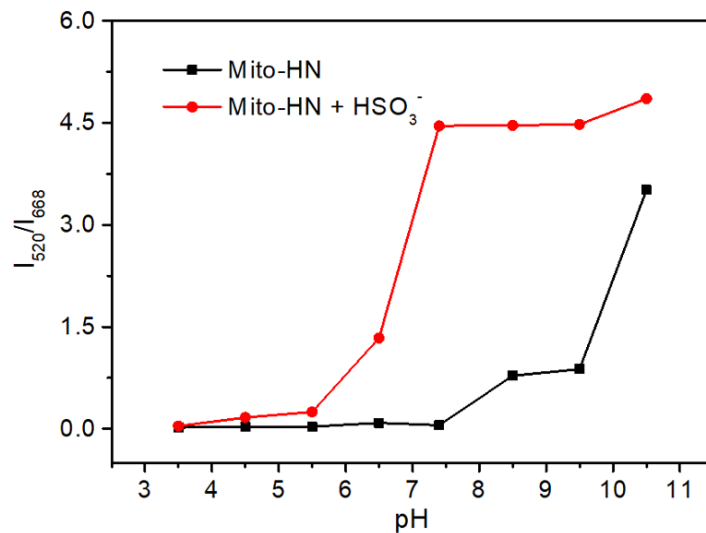

**Figure S8.** The pH effects on the fluorescence behavior of 10  $\mu\text{M}$  **Mito-HN** (black line) and 10  $\mu\text{M}$  **Mito-HN** with 100  $\mu\text{M}$   $\text{HSO}_3^-$  (red line) in PBS (10 mM, containing 10% DMSO).

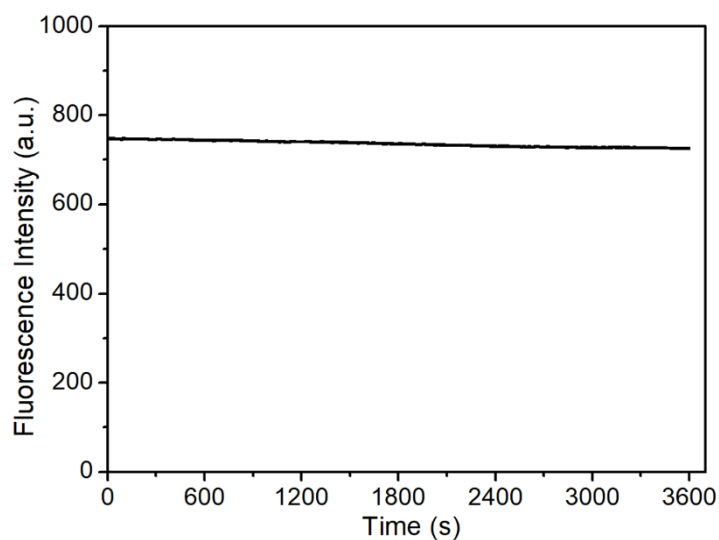

**Figure S9.** Fluorescence intensity of **Mito-HN** (10  $\mu\text{M}$ ) as a function of time in PBS (10 mM, pH 7.4, containing 10% DMSO).



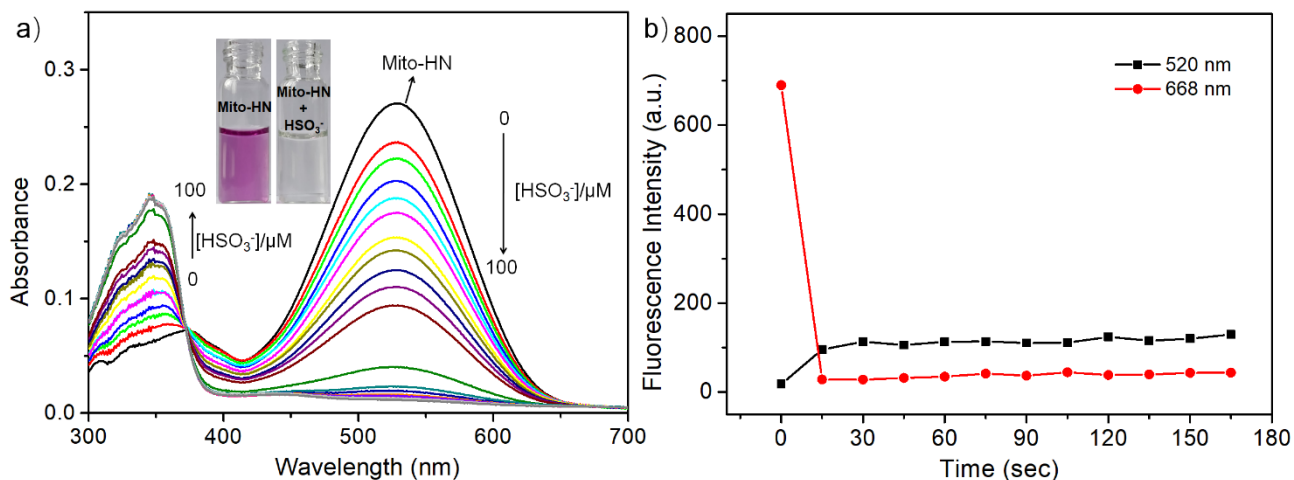

**Figure S10.** (a) Absorption spectra changes of **Mito-HN** (10  $\mu\text{M}$ ) upon addition of  $\text{HSO}_3^-$  (0-100  $\mu\text{M}$ ) in PBS (10 mM, pH 7.4, containing 10% DMSO). (b) Time-dependent fluorescence intensity changes at 520 nm and 668 nm of **Mito-HN** (10  $\mu\text{M}$ ) in the presence  $\text{HSO}_3^-$  (100  $\mu\text{M}$ ) in PBS (10 mM, pH 7.4, containing 10% DMSO).

The detection limit was calculated with the following equation:

$$\text{Detection limit} = 3S_b/k$$

Where  $S_b$  is the standard deviation of blank measurements, which was achieved by measuring the fluorescence spectrum of probe **Mito-HN** ten times, and  $k$  is the slope of the fitted line.

**Table S3.** Comparison of fluorescent probes for  $\text{SO}_2$  derivatives.

| Probes                                                                              | $\lambda_{\text{ex}}/\lambda_{\text{em}}$<br>(nm) | Detection<br>medium                     | Detection<br>limit       | Applications            | Ref. |
|-------------------------------------------------------------------------------------|---------------------------------------------------|-----------------------------------------|--------------------------|-------------------------|------|
| 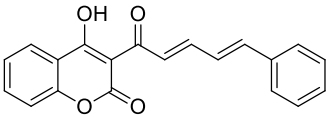 | 377/450                                           | PBS (10 mM, pH 7.4)                     | $0.01 \times 10^{-6}$ M  | Sugar samples           | S1   |
|  | 480/512<br>480/704                                | PBS (pH 5.0, 30% EtOH, 1% DMSO)         | $0.09 \times 10^{-6}$ M  | Lysosome-targeted, cell | 20   |
|  | 467/505<br>467/652                                | PBS (pH 7.4, 10 mM, containing 30% DMF) | $0.072 \times 10^{-6}$ M | Lysosome-targeted, cell | 21   |

|                                                                                     |                    |                                           |                           |                                                 |           |
|-------------------------------------------------------------------------------------|--------------------|-------------------------------------------|---------------------------|-------------------------------------------------|-----------|
| 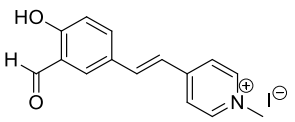   | 460/550            | PBS (pH 7.4, containing 90% DMSO)         | $0.0131 \times 10^{-6}$ M | Cell and zebrafish                              | 22        |
|    | 466/585            | HEPES buffer (pH = 7.4)                   | $0.0083 \times 10^{-6}$ M | Cell                                            | 37        |
|    | 450/485<br>450/667 | PBS (20 mM, pH 7.4, containing 50% MeOH)  | $0.027 \times 10^{-6}$ M  | Sugar samples, cell                             | 30        |
|    | 410/478            | PBS (10 mM, pH 7.4, containing 30% DMF)   | $0.38 \times 10^{-6}$ M   | Cell                                            | S2        |
|   | 470/515<br>470/681 | PBS (20 mM, pH 7.4, containing 0.4% DMSO) | $0.53 \times 10^{-6}$ M   | Mitochondria-targeted, cell                     | S3        |
|  | 375/520<br>375/668 | PBS (10 mM, pH 7.4, 10% DMSO)             | $0.17 \times 10^{-6}$ M   | Mitochondria-targeted, cell and zebrafish, AIEE | This work |

#### 4. Selectivity and interference.

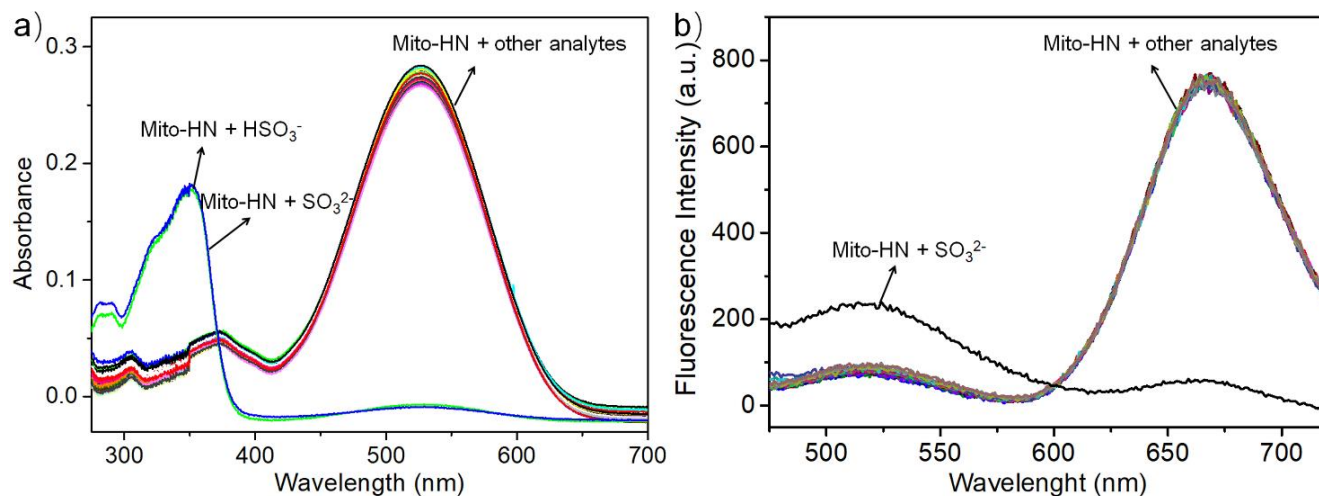

**Figure S11.** (a) Absorption spectra of **Mito-HN** (10  $\mu\text{M}$ ) in the presence of various species, including  $\text{SO}_3^{2-}$ ,  $\text{HSO}_3^-$ ,  $\text{Ca}^{2+}$ ,  $\text{Al}^{3+}$ ,  $\text{Zn}^{2+}$ ,  $\text{Mg}^{2+}$ ,  $\text{Cu}^{2+}$ ,  $\text{Cl}^-$ ,  $\text{F}^-$ ,  $\text{Br}^-$ ,  $\text{I}^-$ ,  $\text{NO}_3^-$ ,  $\text{NO}_2^-$ ,  $\text{N}_3^-$ ,  $\text{HS}^-$ ,  $\text{SO}_4^{2-}$ ,  $\text{S}_2\text{O}_3^{2-}$ ,  $\text{CN}^-$ ,  $\text{AcO}^-$ ,  $\text{H}_2\text{O}_2$ ,  $\text{ClO}^-$ , (10 equiv. for each); Cys (1 mM), Hcy (1 mM); GSH (5 mM). (b) Fluorescence spectra of **Mito-HN** (10  $\mu\text{M}$ ) in the presence of various species, including  $\text{SO}_3^{2-}$ ,  $\text{Ca}^{2+}$ ,  $\text{Al}^{3+}$ ,  $\text{Zn}^{2+}$ ,  $\text{Mg}^{2+}$ ,  $\text{Cu}^{2+}$ ,  $\text{Cl}^-$ ,  $\text{F}^-$ ,  $\text{Br}^-$ ,  $\text{I}^-$ ,  $\text{NO}_3^-$ ,  $\text{NO}_2^-$ ,  $\text{N}_3^-$ ,  $\text{HS}^-$ ,  $\text{SO}_4^{2-}$ ,  $\text{S}_2\text{O}_3^{2-}$ ,  $\text{CN}^-$ ,  $\text{AcO}^-$ ,  $\text{H}_2\text{O}_2$ ,  $\text{ClO}^-$ , (10 equiv. for each); Cys (1 mM), Hcy (1 mM); GSH (5 mM).

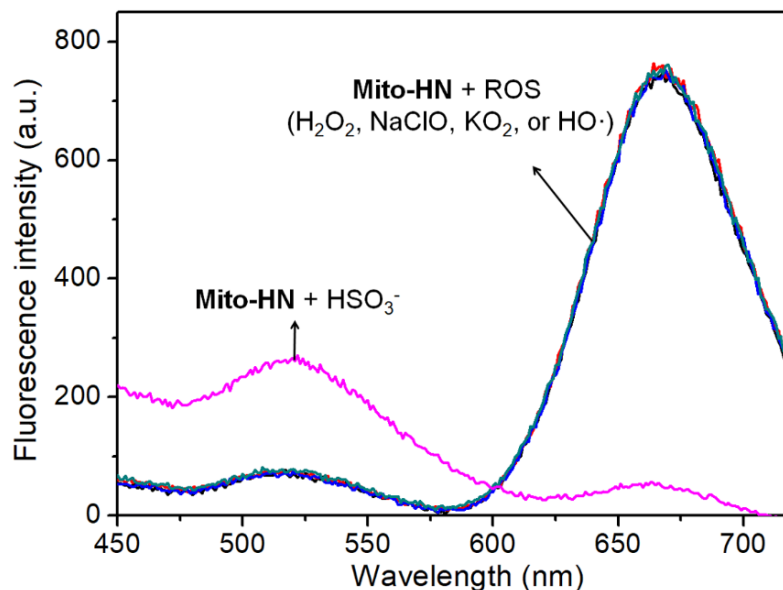

**Figure S12.** Fluorescence spectra of **Mito-HN** (10  $\mu\text{M}$ ) in the presence of reactive oxygen species ( $\text{NaClO}$ ,  $\text{KO}_2$ ,  $\text{H}_2\text{O}_2$ ,  $\text{HO}\cdot$ ) or  $\text{HSO}_3^-$  in PBS (10 mM, pH 7.4, containing 10% DMSO).

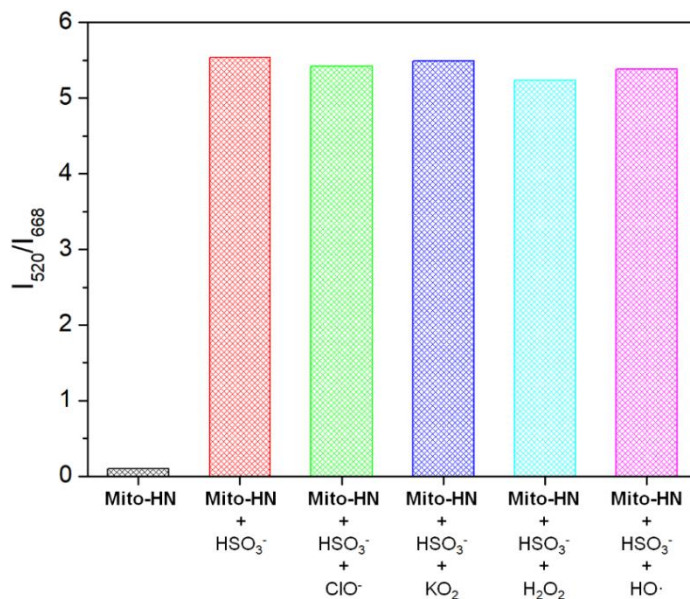

**Figure S13.** Fluorescence responses of **Mito-HN** (10  $\mu\text{M}$ ) in the presence of  $\text{HSO}_3^-$ , followed by adding reactive oxygen species ( $\text{NaClO}$ ,  $\text{KO}_2$ ,  $\text{H}_2\text{O}_2$ ,  $\text{HO}\cdot$ ) in PBS (10 mM, pH 7.4, containing 10% DMSO).

### 5. CCK-8 assay.

HepG2 cells were obtained from the Chinese Academy of Sciences (Shanghai, China) and routinely cultured with Dulbecco's modified Eagle's medium supplemented with 10% fetal bovine serum, 100 U/mL penicillin, and 100  $\mu\text{g}/\text{mL}$  streptomycin at 37°C in 5%  $\text{CO}_2$  atmosphere. The cytotoxicity of **Mito-HN** to HepG2 cells was determined using **CCK-8** assay. Briefly, HepG2 cells were seeded in 96-well plates at a cell density of  $5 \times 10^4$  cells/mL (200  $\mu\text{L}/\text{well}$ ). After 24 h incubation, cells were treated with different concentrations of **Mito-HN** (0, 2.5, 5, 10, 20, and 40  $\mu\text{M}$ ) and continuously incubated at 37 °C for 24 h. After washing with PBS, cells were further cultured by both CCK-8 solution (10  $\mu\text{L}/\text{well}$ ) and supplemented cell culture medium (190  $\mu\text{L}/\text{well}$ ) for 2 h. The absorbance was measured using a microplate spectrophotometer at 450 nm. Each experiment was repeated at least five times. Blank controls were run simultaneously during each experiment. As shown in Figure S10, the percentage of viable HepG2 cells after treatment with 0 - 40  $\mu\text{M}$  of **Mito-HN** for 24 h was over 80%, which demonstrated that probe **Mito-HN** exhibited low cytotoxicity.

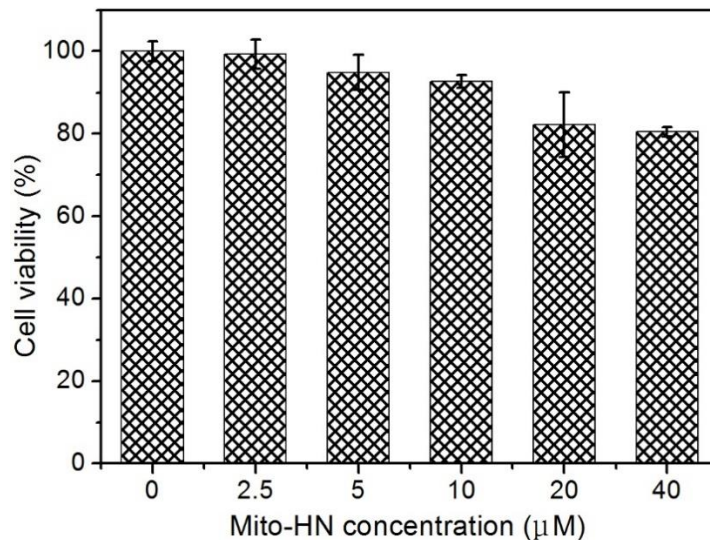

**Figure S14.** Cytotoxicity assay of **Mito-HN** for HepG2 cell after 24-h culture.

## 6. Cell imaging

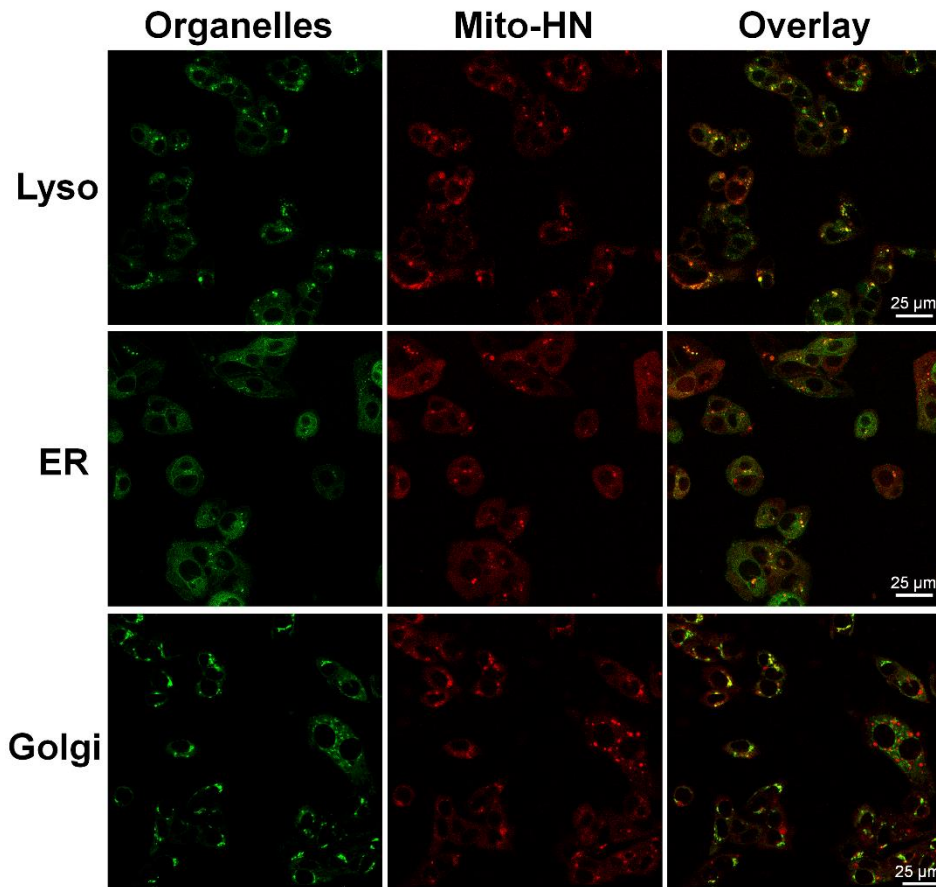

**Figure S15.** Colocalization fluorescence images of HepG2 cells stained with **Mito-HN** and organelles dyes. The first column: fluorescence images from Lyso-Tracker Green (1  $\mu$ M, Ex = 488 nm, collected 500-570 nm), ER-Tracker Green (1  $\mu$ M, Ex = 488 nm, collected 500-570 nm), Golgi-Tracker Green (1  $\mu$ M, Ex=488 nm, collected 500-570 nm); The second column: fluorescence images from **Mito-HN** (10  $\mu$ M, Ex= 405 nm, collected 600-700 nm); The third column: overlay images. The colocalization coefficient was about 0.35, 0.33, 0.41 for lysosomes, endoplasmic reticulum, Golgi apparatus, respectively.

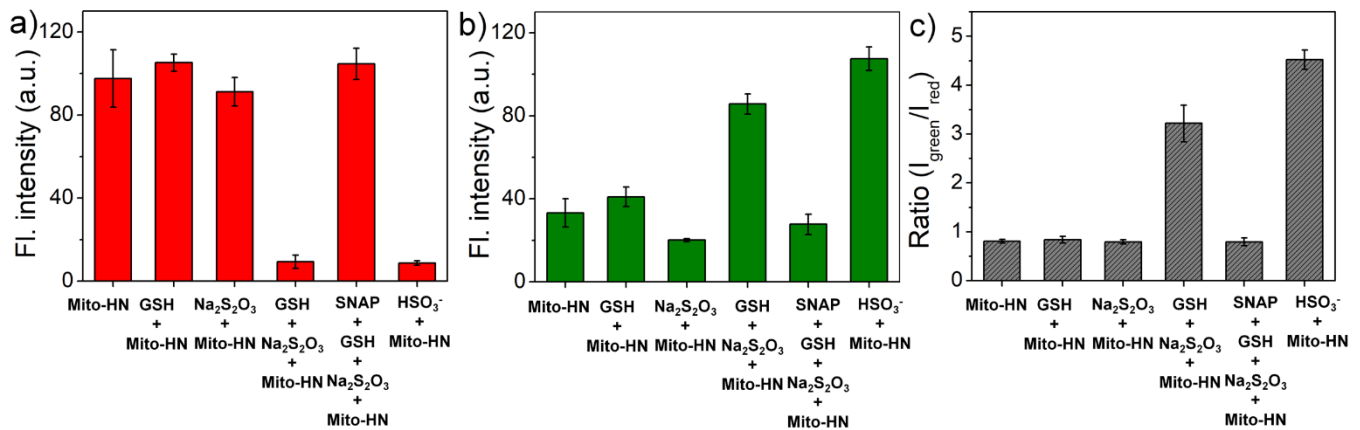

**Figure S16.** The quantification analyses of red, green, and ratiometric signals in living cell imaging in Figure 4.



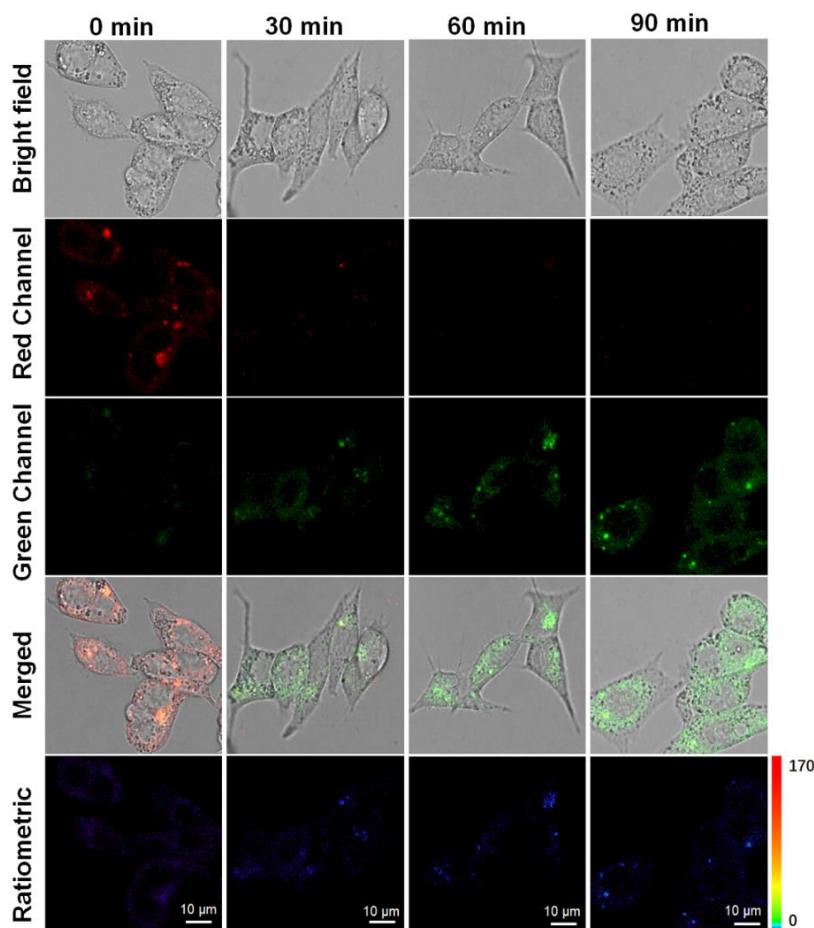

**Figure S17.** Fluorescence images of **Mito-HN** responding to  $\text{HSO}_3^-$  in HepG2 cells. From left to right: HepG2 cells pretreated with **Mito-HN** ( $10 \mu\text{M}$ ) for 30 min, incubated with  $100 \mu\text{M}$   $\text{NaHSO}_3$  for 0, 30, 60, 90 min, and then imaged. From up to down: Bright field; Red channel ( $\lambda_{\text{em}} = 600\text{-}700 \text{ nm}$ ); Green channel ( $\lambda_{\text{em}} = 470\text{-}560 \text{ nm}$ ); Merge; Ratiometric images ( $I_{\text{green}}/I_{\text{red}}$ ).

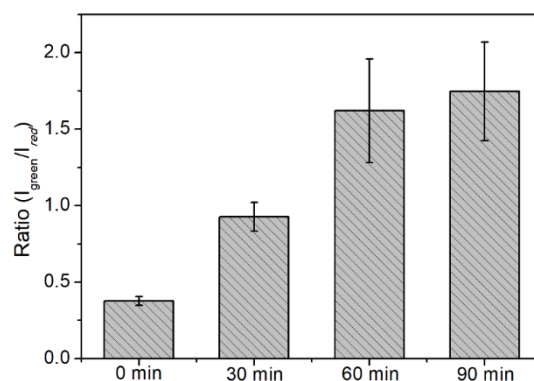

**Figure S18.** The quantification analyses of ratiometric signals in Figure S17.

## 7. References.

- S1. Wang, J.; Hao, Y.; Wang, H.; Yang, S.; Tian, H.; Sun, B.; Liu, Y. Rapidly responsive and highly selective fluorescent probe for bisulfite detection in food. *J. Agric. Food Chem.* **2017**, *65*, 2883-2887.
- S2. Sun, Y.; Liu, J.; Zhang, J.; Yang, T.; Guo, W. Fluorescent probe for biological gas  $\text{SO}_2$  derivatives bisulfite and sulfite. *Chem. Commun.* **2013**, *49*, 2637-2639.
- S3. Zhang, W.; Huo, F.; Zhang, Y.; Yin, C. Dual-site functionalized NIR fluorescent material for a discriminative concentration-dependent response to  $\text{SO}_2$  in cells and mice. *J. Mater. Chem. B* **2019**, *7*, 1945-1950.
